# Supplementary material
Source: PubMed Central journal article supplement (PMC4074271)
Supplement: supp_140.8.1720_DEV092304.pdf [file supp_140.8.1720_DEV092304.pdf]

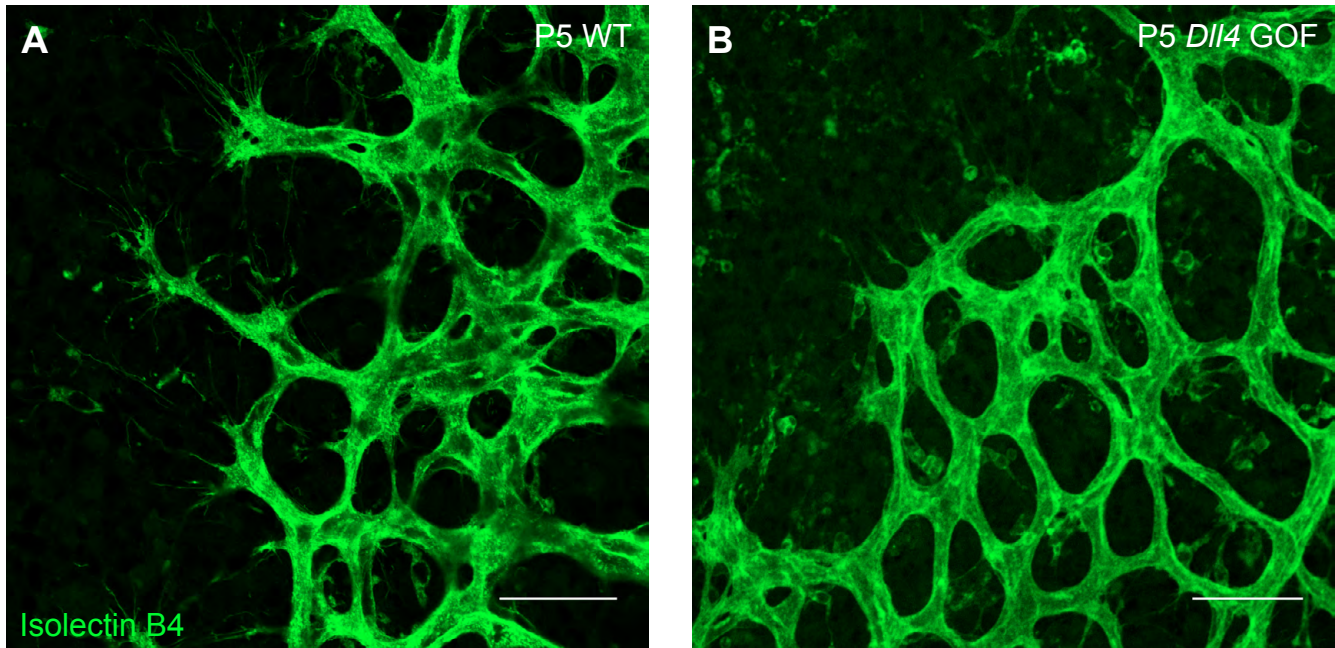

**Fig. S1. *Dll4* overexpression decreases tip cell density in retina vasculature.** (A,B) Confocal images of wild-type and *Dll4* gain-of-function retinas at postnatal day P5. Vascular plexus was stained for endothelial marker isolectin B4. *Dll4* overexpression significantly decreases the number of tip cells and filopodia extensions compared with control. Scale bar: 45  $\mu\text{m}$ .

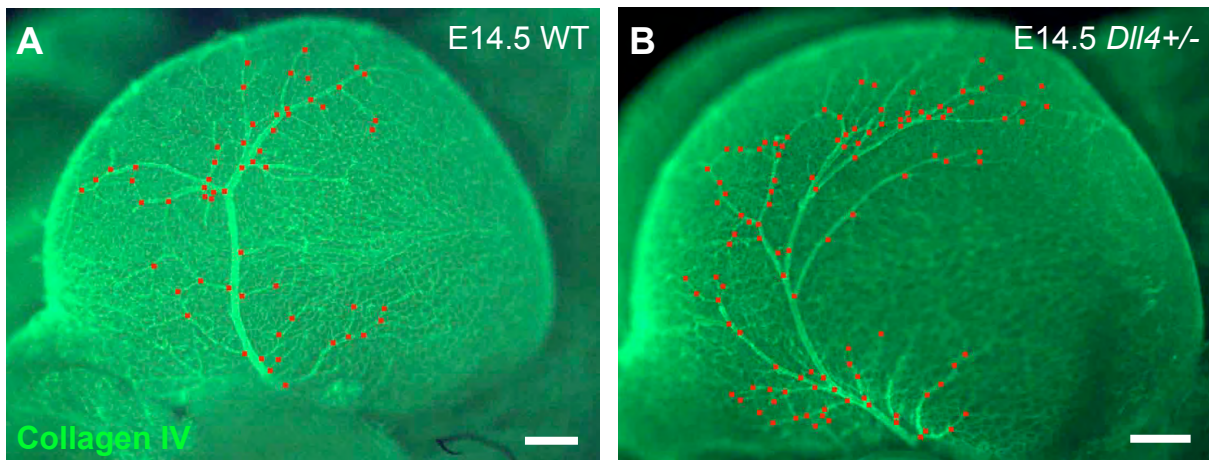

**Fig. S2. Quantification of MCA branching in mouse embryos.** (A,B) Epifluorescent images of wild-type and *Dll4*<sup>+/-</sup> brains stained for collagen IV at embryonic stage E14.5. Red dots highlight MCA branch points. Scale bar: 500  $\mu\text{m}$ .

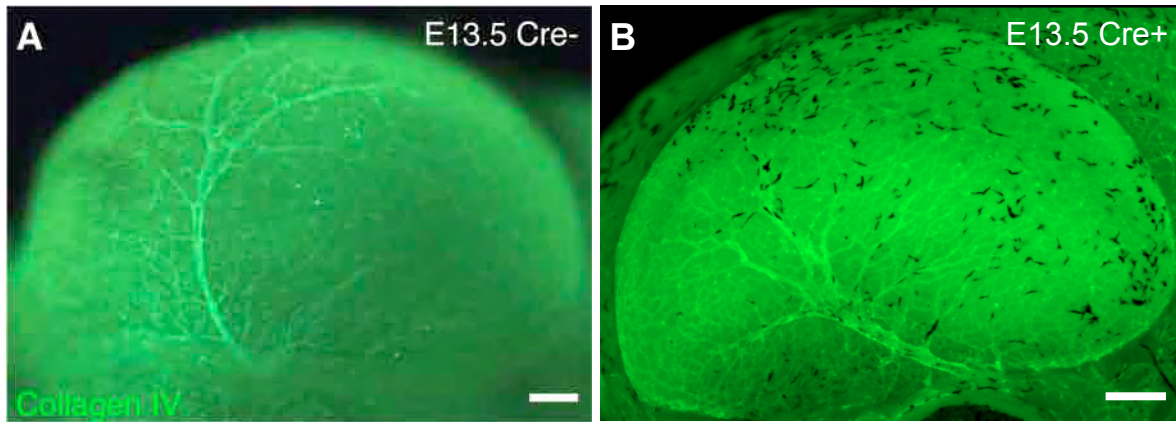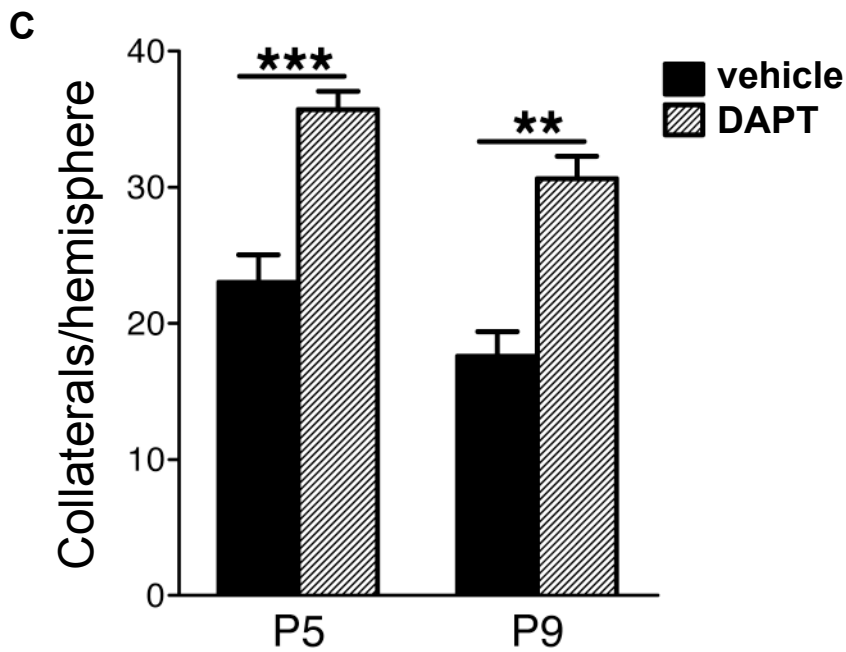

**Fig. S3. Genetic and pharmacological inhibition of *Notch1* increases collateral numbers in the brain.** (A,B) Inducible endothelium-specific inactivation of *Notch1* was obtained injecting tamoxifen into *Cdh5-CreERT2/R26R/Notch1<sup>flxed/flxed</sup>* mice at embryonic day E11.5. The E13.5 vascular plexus was stained for collagen IV and  $\beta$ -galactosidase (B, black). Even at low recombination frequency (B), MCA in *Notch1* loss-of-function brains shows hyperbranching, resembling *Dll4<sup>+/-</sup>* phenotype. Scale bar: 500  $\mu$ m. (C) Bar graphs display collateral arteriolar density in P5 and P9 brains after treatment with Notch inhibitor DAPT (100 mg/kg body weight) or vehicle (corn oil) at day P2 and P4. Post-natal DAPT treatment increased pial collateral numbers. Data are shown as mean  $\pm$  s.e.m.,  $n=5$  mice per group. \*\* $P<0.01$  versus vehicle; \*\*\* $P<0.005$  versus vehicle.

**A**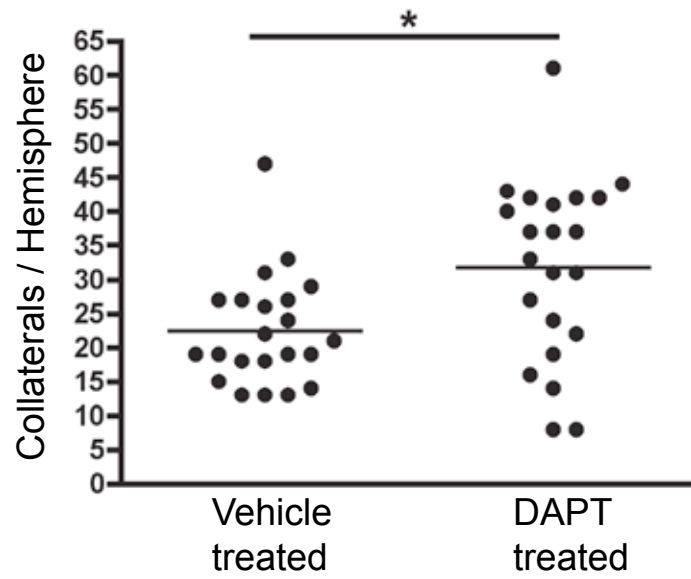**B**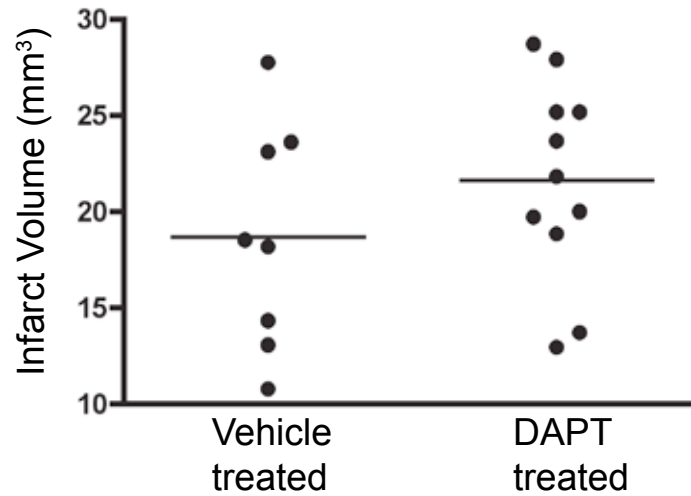

**Fig. S4. Transient inhibition of notch signaling with DAPT augments collateral number without improving stroke volume upon MCA occlusion.** (A) Pregnant mice were injected intraperitoneally at E10.5, E11.5 and E12.5 with vehicle (5% ethanol in corn oil) or DAPT at a final concentration of 100 mg/kg. Mice were sacrificed at 8 weeks of age and pial collaterals were counted after PECAM1 staining. There is a significant increase in collateral number in the DAPT-treated group.  $*P < 0.05$ . Mann-Whitney-U test. (B) Pregnant mice were injected as in A with vehicle or DAPT, and 8-week-old mice were subjected to MCA occlusion and infarct volume was measured. There were no significant differences in infarct volume between the treatment groups.

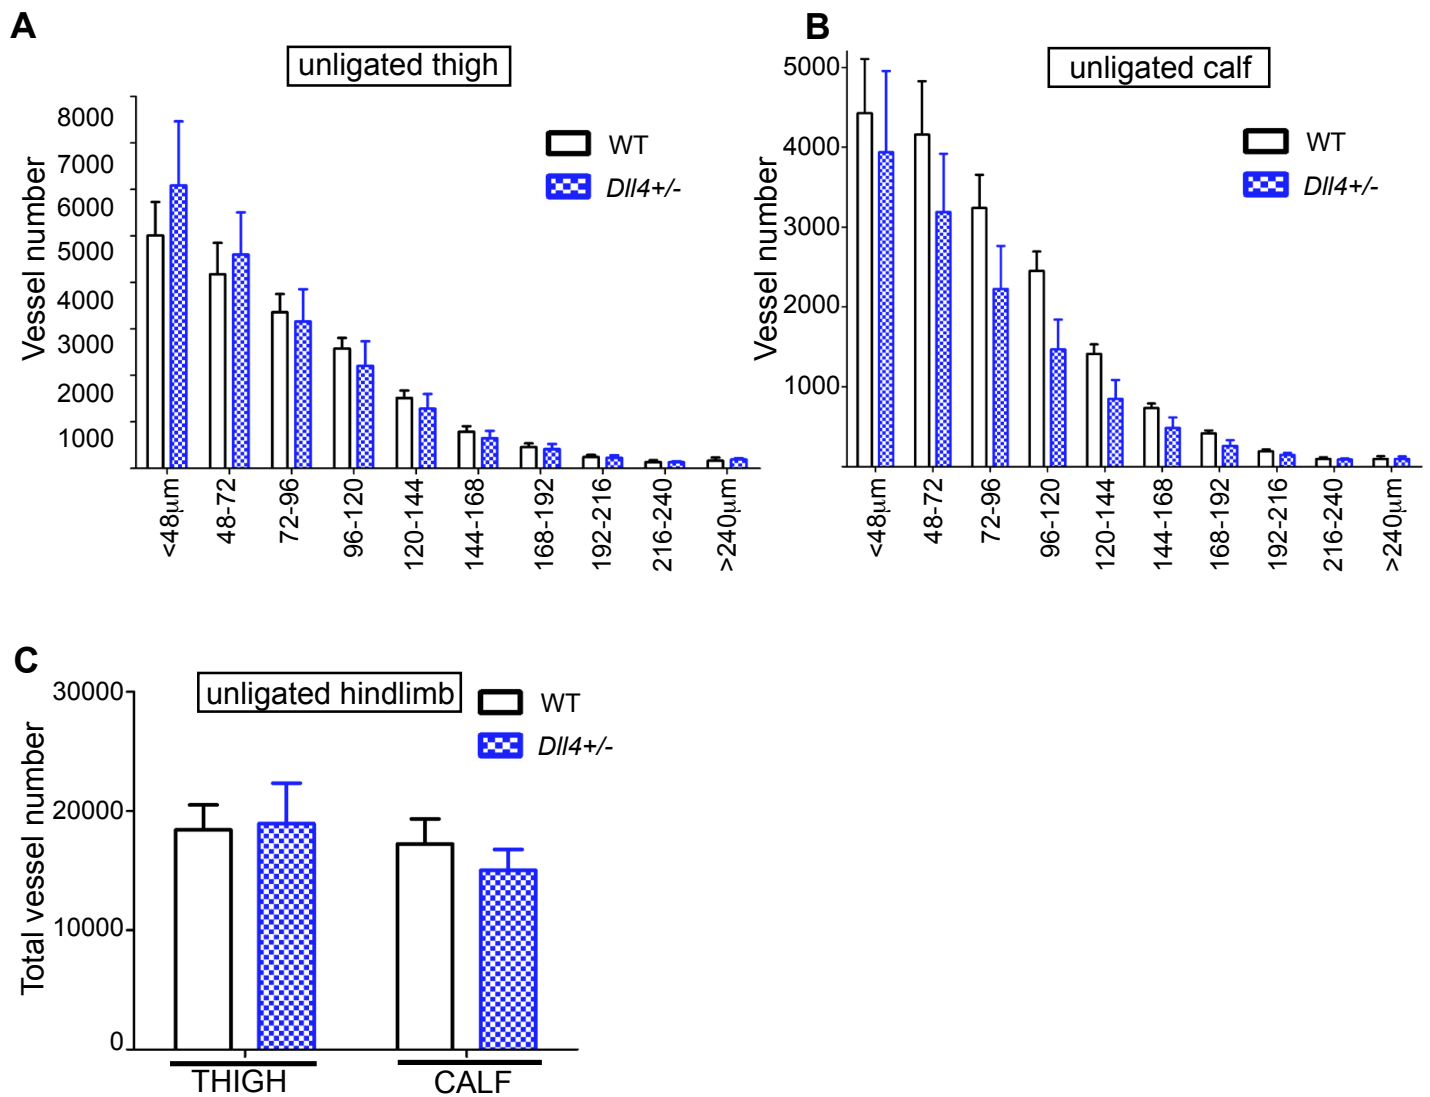

**Fig. S5. Micro-CT analysis of unligated control hindlimb vasculature.** (A,B) Quantitative analysis of micro-CT images in thigh and calf of unligated left hindlimb in wild type ( $n=4$ ) and *Dll4*<sup>+/-</sup> ( $n=3$ ). Shown are total numbers of vascular structures per indicated diameter class in consecutive  $z$ -axis slices. (C) Total arteriolar number in unligated left thigh and calf of wild-type and *Dll4*<sup>+/-</sup> mice based on micro-CT imaging. Vessel numbers are comparable in *Dll4*<sup>+/-</sup> and wild type. The data are shown as mean $\pm$ s.e.m.

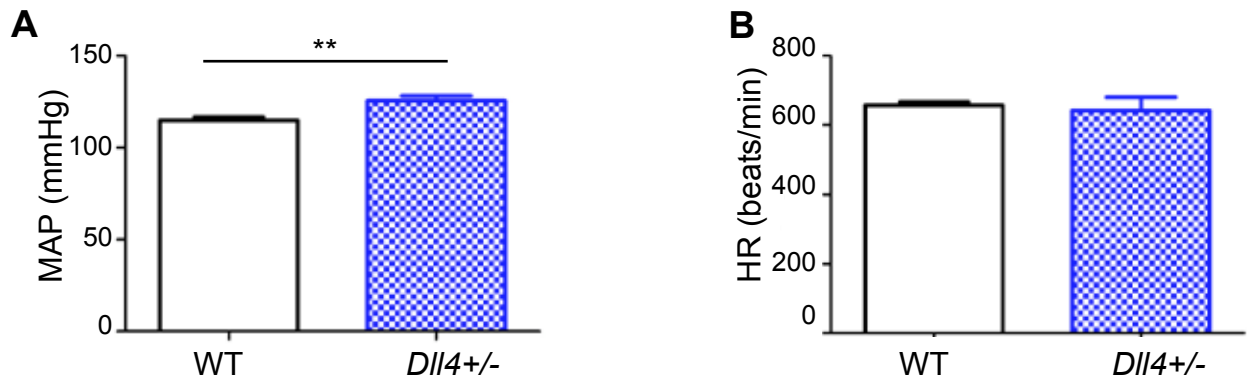

**Fig. S6. Arterial blood pressure and heart rate.** Mean arterial pressure (MAP in mmHg) (A) and heart rate (HR in beats per minute) (B) in wild-type and *Dll4*<sup>+/-</sup> mice. The data are shown as mean±s.e.m; wild type, *n*=5; *Dll4*<sup>+/-</sup>, *n*=6; \*\**P*<0.01.

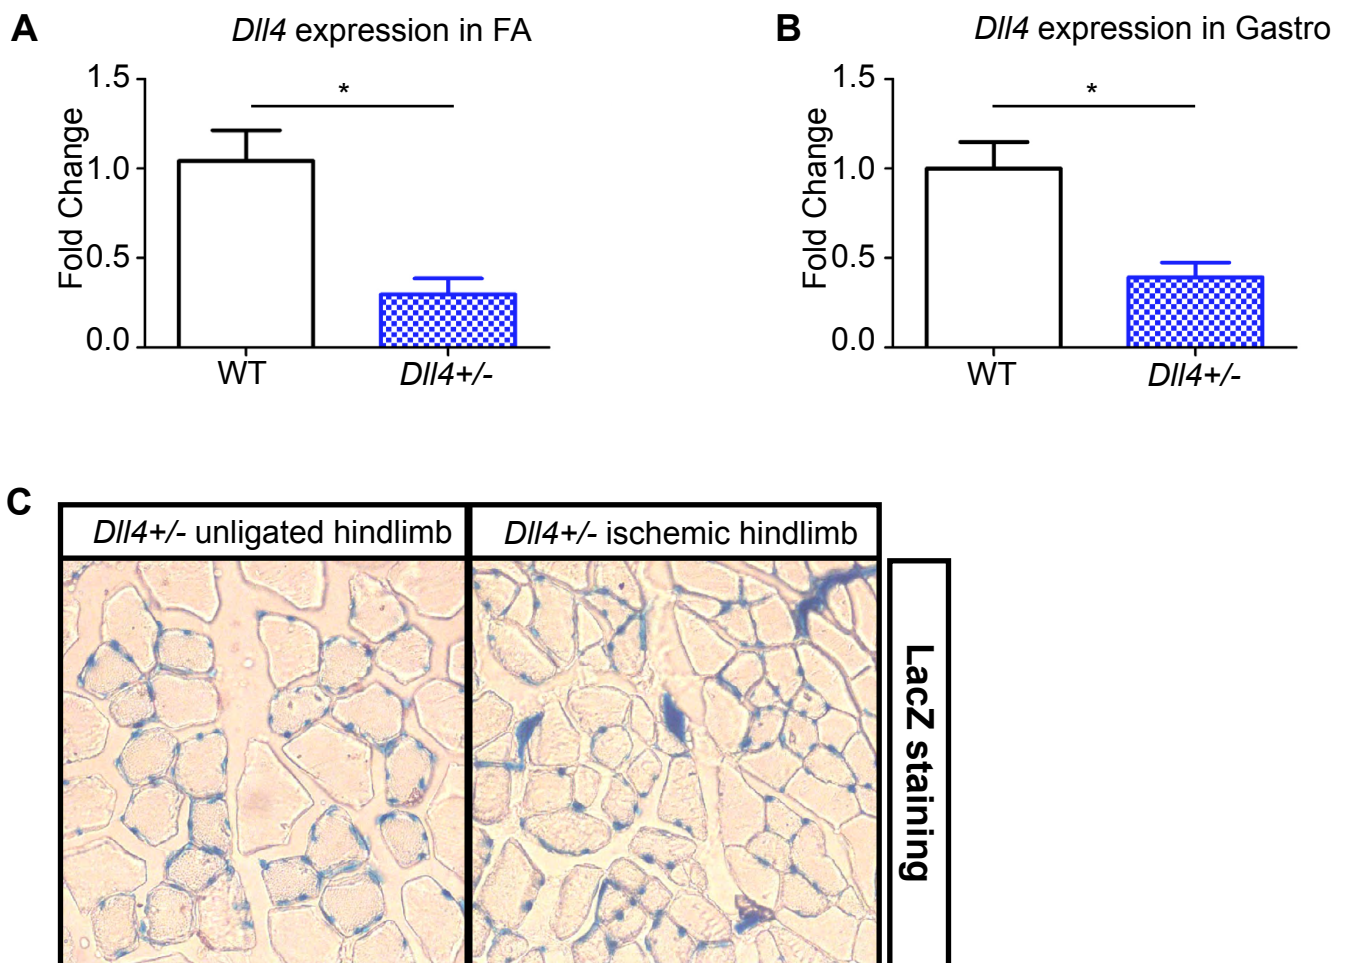

**Fig. S7. *Dll4* expression in the mouse hindlimb.** (A,B) Taqman analysis of *Dll4* expression in the femoral artery (FA) (A) and gastrocnemius muscle (Gastro) (B) of wild-type (*n*=8) and *Dll4*<sup>+/-</sup> (*n*=8) mice. The data are shown as mean±s.e.m.; \**P*<0.05. (C)  $\beta$ -galactosidase staining (*lacZ*) staining on hindlimb cryosections in *Dll4*<sup>+/-</sup> mice. There is strong staining in vessels.

**Table S1. Real-time PCR primers and probes**

| Gene          | Forward primer             | Reverse primer         | Probe                                                   |
|---------------|----------------------------|------------------------|---------------------------------------------------------|
| <i>Hif1a</i>  | TCAGAGGAAGCGAAAAATGGA      | AGTCACCTGGTTGCTGCAATAA | FAM-5'-<br>TTCCAATTCCTGCTGCTTGAAAAAGGG-3'-<br>TAMRA     |
| <i>Hif1b</i>  | GCATGGGCTCACGAAGGT         | AACAGGGTCCACGGAGCTAGT  | FAM-5'-TTCATCTGCCGCATGAGGTGTGG-3'-<br>TAMRA             |
| <i>Vegfa</i>  | GCAGGCTGCTGTAACGATGAA      | TTTGATCCGCATGATCTGCAT  | FAM-5'-CCCTGGAGTGCGTGCCCA-3'-TAMRA                      |
| <i>Kdr</i>    | ACTGCAGTGATTGCCATGTTCT     | CCTTCATTGGCCCGCTTAA    | FAM-5'-<br>TGGCTCCTTCTTGTCATTGTCCTACGGA-3'-<br>TAMRA    |
| <i>Notch1</i> | CATCCGTGGCTCCATTGTCTA      | GACGCAAGAGCACCTAGGAA   | FAM-5'-TGGAGATCGACAACCGGCAATGT-3'-<br>TAMRA             |
| <i>Dll4</i>   | CGAATGCCCCCCTCAACT         | GTTTCGGCTTGGACCTCTGTTC | FAM-5'-<br>CGGCTCTAACTGTGAGAAGAAAGTAGACAGG-<br>3'-TAMRA |
| <i>Efnb2</i>  | TCCAGAGCTAGAAGCTGGTACAAATG | ATGCCCCGCGCTGTTG       | FAM-5'-ATCGGTGCTAGAACCTGGATTTGG-<br>3'-TAMRA            |
| <i>Nrp1</i>   | ACAGCAAGCGCAAGGCTAA        | AGGTGAAAACGTCCGAAGCT   | FAM-5'-TCGTTCGAAGGCAACAACAACACTATG-<br>3'-TAMRA         |
